# Supplementary material for: When Does NICE Recommend the Use of Health Technologies Within a Programme of Evidence Development? A Systematic Review of NICE Guidance
Source: PubMed Central journal article supplement — Pharmacoeconomics. 2013 Jan 4;31(2):137–49. doi: 10.1007/s40273-012-0013-6 (PMC3561612; doi:10.1007/s40273-012-0013-6), 2013-01-04
Supplement: 40273_2012_13_MOESM1_ESM.pdf [file 40273_2012_13_MOESM1_ESM.pdf]

*Pharmacoeconomics*

# **When Does NICE Recommend the Use of Health Technologies Within a Programme of Evidence Development?**

A Systematic Review of NICE Guidance

*Louise Longworth, JiHee Youn, Laura Bojke, Stephen Palmer, Susan Griffin, Eldon Spackman, Karl Claxton*

## **Correspondence**

Louise Longworth, Health Economics Research Group, Brunel University, Uxbridge, Middlesex, UB3 3PH, UK  
e-mail: [louise.longworth@brunel.ac.uk](mailto:louise.longworth@brunel.ac.uk)

---

## **Electronic Supplementary Material**

**Supplementary table: Appraisals including OIR or AWR recommendations in draft/final guidance**

| TA  | Title                                                                           | Date       | ACD/ FAD  |
|-----|---------------------------------------------------------------------------------|------------|-----------|
| 2   | Prostheses for primary total hip replacement                                    | April 2000 | FAD only* |
| 5   | Cervical cancer - liquid based cytology                                         | May 2000   | FAD only* |
| 6   | Taxanes for Breast cancer                                                       | June 2000  | FAD only* |
| 8   | Hearing aid technology                                                          | July 2000  | FAD only* |
| 16  | Knee joints (defective) - autologous cartilage transplantation                  | Dec 2000   | FAD only* |
| 17  | Colorectal cancer - laparoscopic surgery                                        | Dec 2000   | FAD only* |
| 23  | Recurrent malignant glioma (Brain cancer) - temozolomide                        | April 2001 | FAD only* |
| 30  | Taxanes for Breast cancer                                                       | Sept 2001  | FAD only* |
| 33  | Colorectal cancer (advanced) - irinotecan, oxaliplatin & raltitrexed            | March 2002 | FAD only* |
| 35  | Arthritis (juvenile idiopathic) - etanercept                                    | March 2002 | FAD only* |
| 36  | Rheumatoid arthritis - Etanercept and infliximab                                | March 2002 | FAD only* |
| 37  | Lymphoma (follicular non-Hodgkin's) - rituximab                                 | March 2002 | FAD only* |
| 44  | Hip disease - metal on metal hip resurfacing                                    | June 2002  | ACD & FAD |
| 50  | Leukaemia (chronic myeloid) - imatinib                                          | May 2002   | ACD only  |
| 51  | Depression and anxiety - computerised cognitive behaviour therapy (CCBT)        | Oct 2002   | ACD & FAD |
| 60  | Diabetes - patient education models                                             | Nov 2002   | ACD only  |
| 65  | Aggressive Non-Hodgkin's lymphoma - rituximab                                   | Sept 2003  | ACD & FAD |
| 68  | Macular degeneration (age-related) - photodynamic therapy                       | Sept 2003  | ACD & FAD |
| 70  | Leukaemia (chronic myeloid) - imatinib                                          | Oct 2003   | FAD only  |
| 72  | Rheumatoid arthritis - anakinra                                                 | Nov 2003   | ACD & FAD |
| 75  | Hepatitis C - pegylated interferons, ribavirin and alfa interferon              | Jan 2004   | ACD & FAD |
| 86  | Gastro-intestinal stromal tumours (GIST) - imatinib                             | May 2004   | ACD only  |
| 89  | Cartilage injury - autologous chondrocyte implantation (ACI)                    | May 2005   | ACD & FAD |
| 92  | Tooth decay - HealOzone                                                         | July 2005  | FAD only  |
| 93  | Colorectal cancer (advanced) - irinotecan, oxaliplatin and raltitrexed          | Aug 2005   | ACD & FAD |
| 97  | Depression and anxiety - computerised cognitive behavioural therapy             | Feb 2006   | ACD & FAD |
| 99  | Immunosuppressive therapy for renal transplantation in children and adolescents | April 2006 | FAD only  |
| 104 | Psoriatic arthritis - etanercept and infliximab                                 | June 2005  | ACD only  |
| 111 | Alzheimer's disease - donepezil, galantamine, rivastigmine and memantine        | Nov 2006†  | ACD & FAD |
| 113 | Diabetes (type 1 and 2) - inhaled insulin                                       | Dec 2006   | ACD & FAD |
| 121 | Glioma - carmustine implants and temozolomide                                   | Dec 2005   | ACD only  |
| 129 | Multiple myeloma - bortezomib                                                   | July 2006  | ACD only  |
| 130 | Rheumatoid arthritis - adalimumab, etanercept and infliximab                    | Feb 2006   | ACD only  |
| 135 | Mesothelioma - pemetrexed disodium                                              | March 2006 | ACD only  |
| 142 | Anaemia - erythropoietin (alpha and beta) and darbepoetin                       | July 2005  | ACD only  |
| 143 | Ankylosing spondylitis - adalimumab, etanercept and infliximab                  | July 2007  | ACD only  |
| 159 | Pain (chronic neuropathic or ischaemic) - spinal cord stimulation               | Oct 2008   | ACD & FAD |
| 163 | Ulcerative colitis (acute exacerbations) - infliximab                           | Dec 2008   | ACD & FAD |
| 166 | Hearing impairment - cochlear implants                                          | Dec 2007   | ACD only  |
| 167 | Abdominal aortic aneurysm - endovascular stent-grafts                           | Feb 2009   | ACD & FAD |

\*ACDs were not publicly available for these appraisals. †Updated in 2009. FAD refers to final guidance.
